# Supplementary material
Source: ML conference proceedings conference paper supplement (https://openaccess.thecvf.com/content/CVPR_2019/html/Zhou_Bottom-Up_Object_Detection_CVPR_2019_paper.html)
Supplement: Supplementary file 1 [file Zhou_Bottom-Up_Object_Detection_CVPR_2019_supplemental.pdf]

# Bottom-up Object Detection by Grouping Extreme and Center Points - Supplementary Material

Xingyi Zhou  
UT Austin

zhouxy@cs.utexas.edu

Jiacheng Zhuo  
UT Austin

jzhuo@cs.utexas.edu

Philipp Krähenbühl  
UT Austin

philkr@cs.utexas.edu

---

## Algorithm 1: Center Grouping

---

**Input** : Center and Extrempoint heatmaps of an image for one category:  $\hat{Y}^{(c)}, \hat{Y}^{(t)}, \hat{Y}^{(l)}, \hat{Y}^{(b)}, \hat{Y}^{(r)} \in (0, 1)^{H \times W}$   
Center and peak selection thresholds:  $\tau_c$  and  $\tau_p$

**Output**: Bounding box with score

// Convert heatmaps into coordinates of keypoints.  
//  $\mathcal{T}, \mathcal{L}, \mathcal{B}, \mathcal{R}$  are sets of points.  
 $\mathcal{T} \leftarrow \text{ExtractPeak}(\hat{Y}^{(t)}, \tau_p)$   
 $\mathcal{L} \leftarrow \text{ExtractPeak}(\hat{Y}^{(l)}, \tau_p)$   
 $\mathcal{B} \leftarrow \text{ExtractPeak}(\hat{Y}^{(b)}, \tau_p)$   
 $\mathcal{R} \leftarrow \text{ExtractPeak}(\hat{Y}^{(r)}, \tau_p)$   
 $B_x \leftarrow$  A list of empty lists of size  $2W$   
 $B_y \leftarrow$  A list of empty lists of size  $2H$

**for**  $t \in \mathcal{T}, b \in \mathcal{B}$  **do**  
  **if**  $t_y \leq b_y$  **then**  
    | Add  $(t, b)$  to  $B_y[t + b]$   
  **end**  
**end**

**for**  $l \in \mathcal{L}, r \in \mathcal{R}$  **do**  
  **if**  $l_x \leq r_x$  **then**  
    | Add  $(l, r)$  to  $B_x[l + r]$   
  **end**  
**end**

**for**  $i \in [0, 2W - 1], j \in [0, 2H - 1]$  **do**  
   $c_x = i/2, c_y = j/2$   
  **if**  $\hat{Y}_{c_x, c_y}^{(c)} \geq \tau_c$  **then**  
    **for**  $(l, r) \in B_x[i], (t, b) \in B_y[j]$  **do**  
      **if**  $t_y \leq l_y, r_y \leq b_y$  **and**  $l_x \leq t_x, b_x \leq r_x$  **then**  
        | Add Bounding box  $(l_x, t_y, r_x, b_y)$  with score  
        |  $(\hat{Y}_{t_x, t_y}^{(t)} + \hat{Y}_{l_x, l_y}^{(l)} + \hat{Y}_{b_x, b_y}^{(b)} + \hat{Y}_{r_x, r_y}^{(r)} + \hat{Y}_{c_x, c_y}^{(c)})/5$ .  
      **end**  
    **end**  
  **end**  
**end**

---

## 1. $O(n^2)$ grouping algorithm

Algorithm. 1 gives an  $O(n^2)$  center grouping algorithm. The basic idea is to separate the enumeration between  $x$  dimension and  $y$  dimension and early reject invalid bounding boxes. However, the algorithm is hard to be accelerated by GPU. On the other hand,  $n$  is less than 40 in our experiments and the  $O(n^4)$  grouping algorithm runs effectively on GPU.

---

|                 | $AP$ | $AR_1$ | $AR_{10}$ | $AR_{100}$ | $AR_S$ | $AR_M$ | $AR_L$ |
|-----------------|------|--------|-----------|------------|--------|--------|--------|
| CornerNet (SS)  | 40.5 | 35.3   | 54.3      | 59.1       | 37.4   | 61.9   | 76.9   |
| CornerNet (MS)  | 42.1 | 36.4   | 55.7      | 60.0       | 38.5   | 62.7   | 77.4   |
| ExtremeNet (SS) | 39.8 | 31.6   | 49.9      | 53.0       | 30.0   | 56.5   | 69.5   |
| ExtremeNet (MS) | 43.2 | 34.7   | 55.6      | 60.0       | 37.0   | 63.3   | 78.1   |

---

Table 1: Average recall evaluation on COCO test-dev comparing to CornerNet [1]. SS/MS are short for single-scale/multi-scale testing, respectively.  $AR_k$  is the bounding box recall of the top  $k$  predictions.  $AR_S, AR_M, AR_L$  are the recall of the top 100 predictions for small, median, large objects, respectively.

We find the  $O(n^2)$  algorithm runs slower in practice.

## 2. Average recall evaluation

Table. 1 shows the average recall on COCO test-dev set. We observe that our single-scale model yields considerably lower recall than single scale CornerNet, although their overall AP are close. While in the multi-scale setting, the AR of ExtremeNet and CornerNet are comparable. This shows multi-scale testing benefits ExtremeNet by increasing its recall. It can be understood that our center grouping requires strict pixel-level accuracy for the matching between the computed geometric center and the center heatmap. Multi-scale testing implicitly gives an error tolerance and gives more detections at a good precision.

## 3. More qualitative results

More qualitative results. We *uniformly* sample 50 images from the 5000 images of COCO val2017. We show detection results with confidence  $\geq 0.5$ . First and second column: our predicted extreme point heatmap and center heatmap. Third column: our predicted bounding box and the octagon mask formed by extreme points. Fourth column: resulting masks of feeding our extreme point predictions to DeepExtremeCut [2].

Extreme point heatmap

Center heatmap

Octagon mask

Extreme points+DEXTR

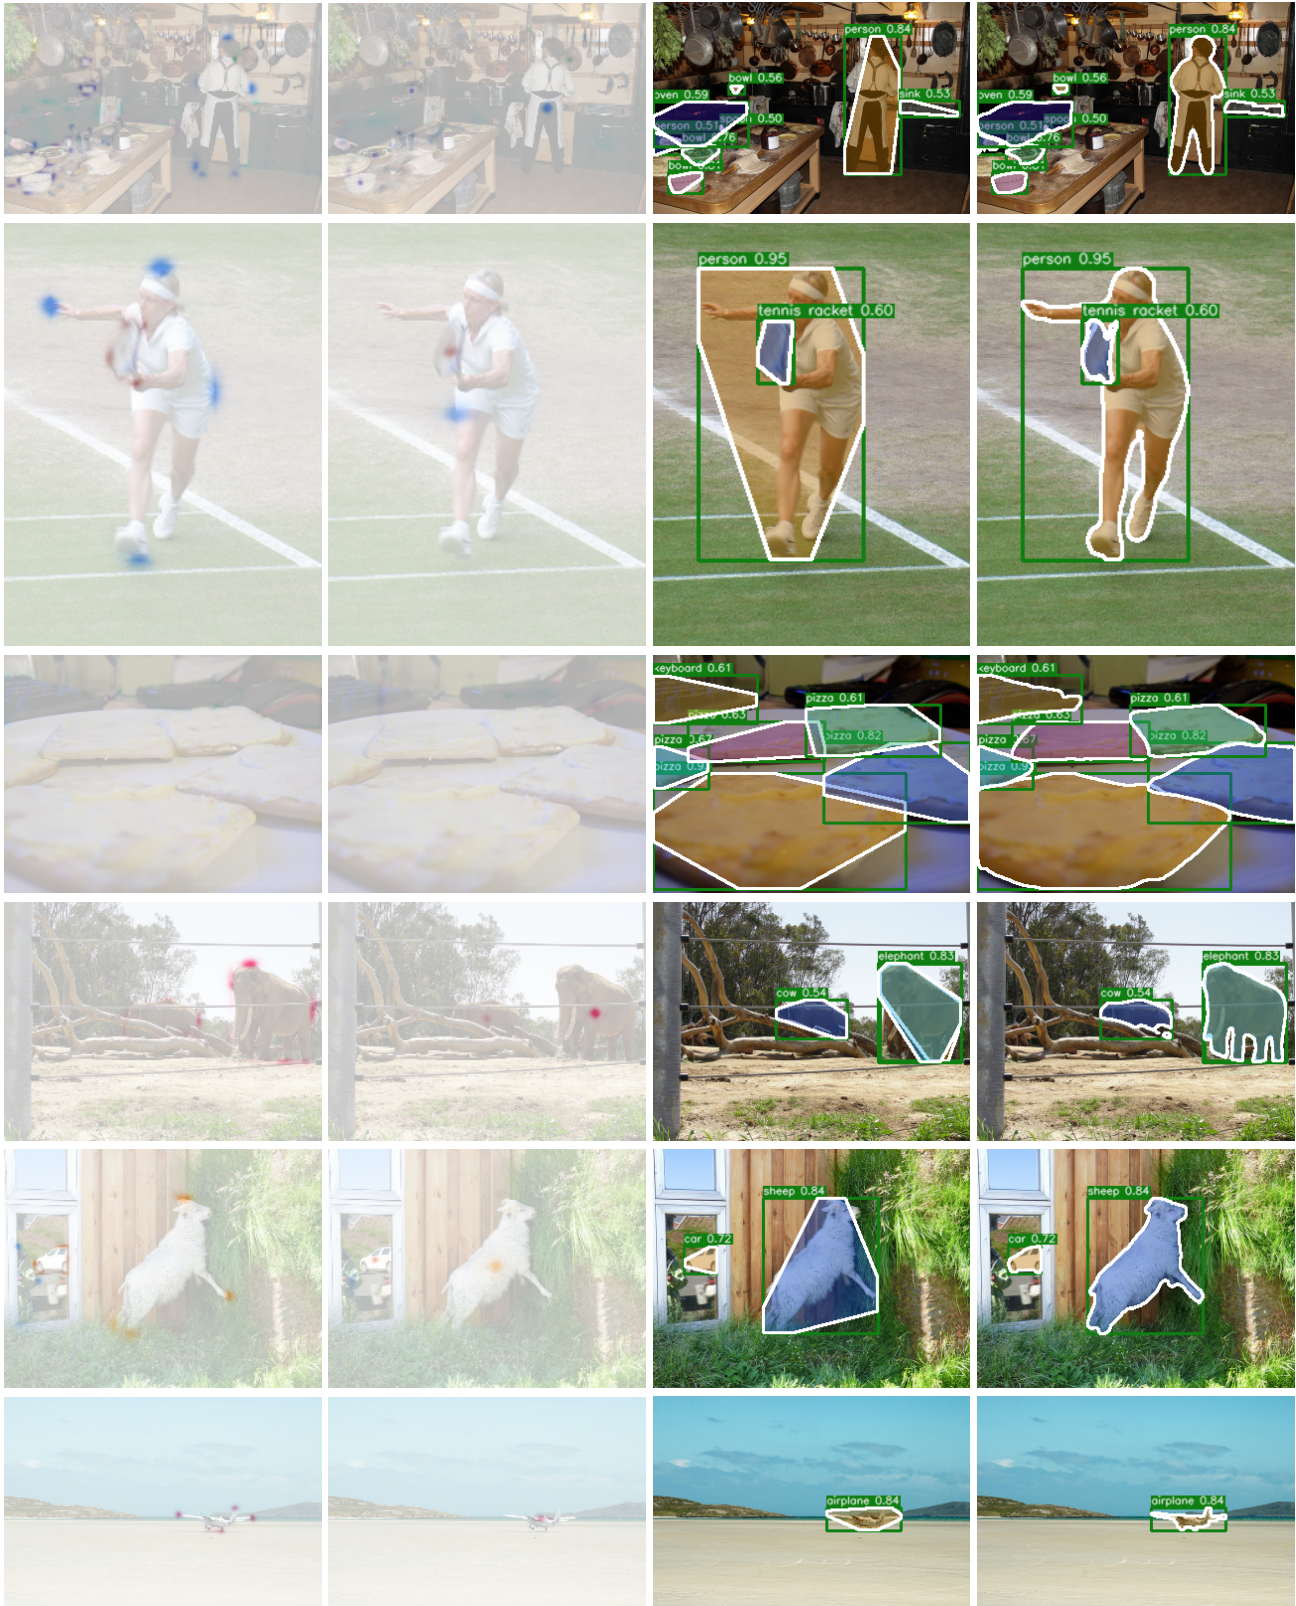

Extreme point heatmap

Center heatmap

Octagon mask

Extreme points+DEXTR

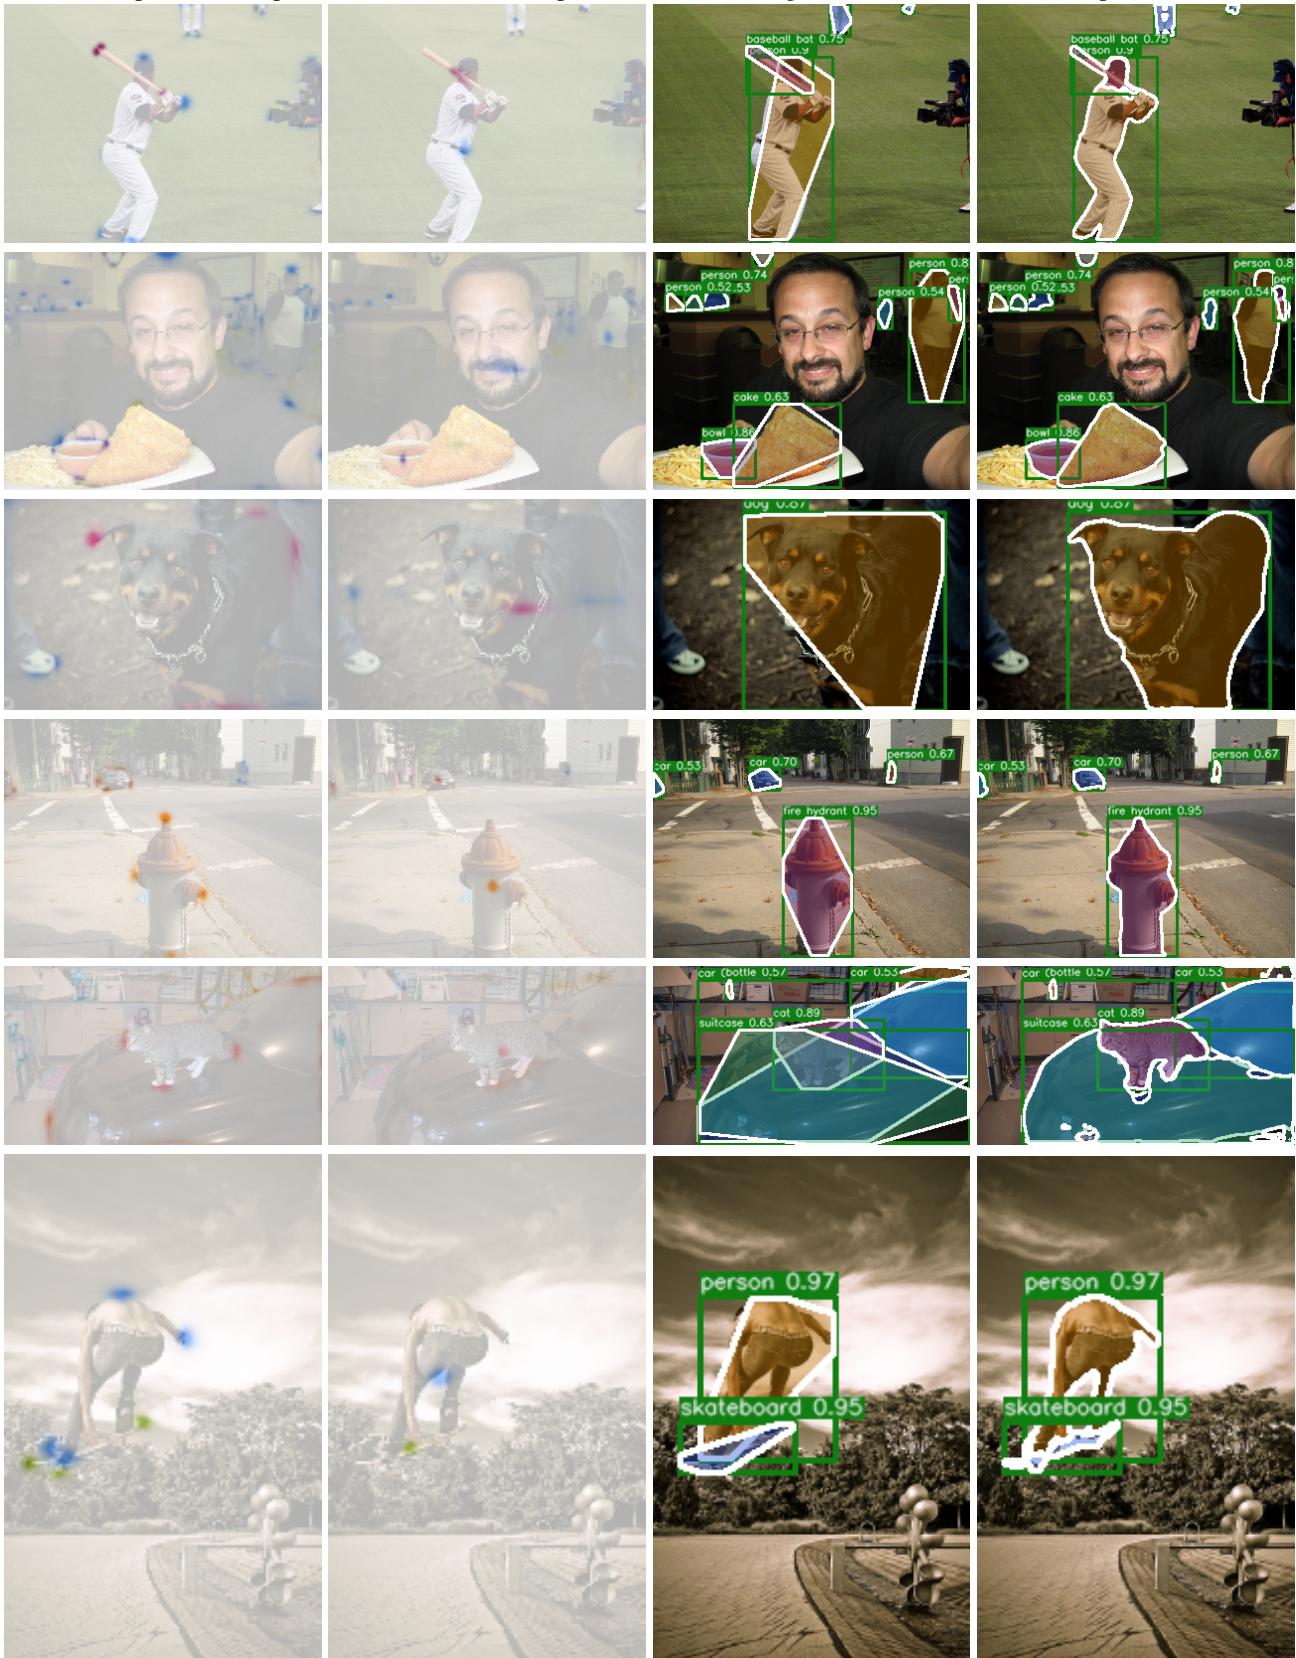

Extreme point heatmap

Center heatmap

Octagon mask

Extreme points+DEXTR

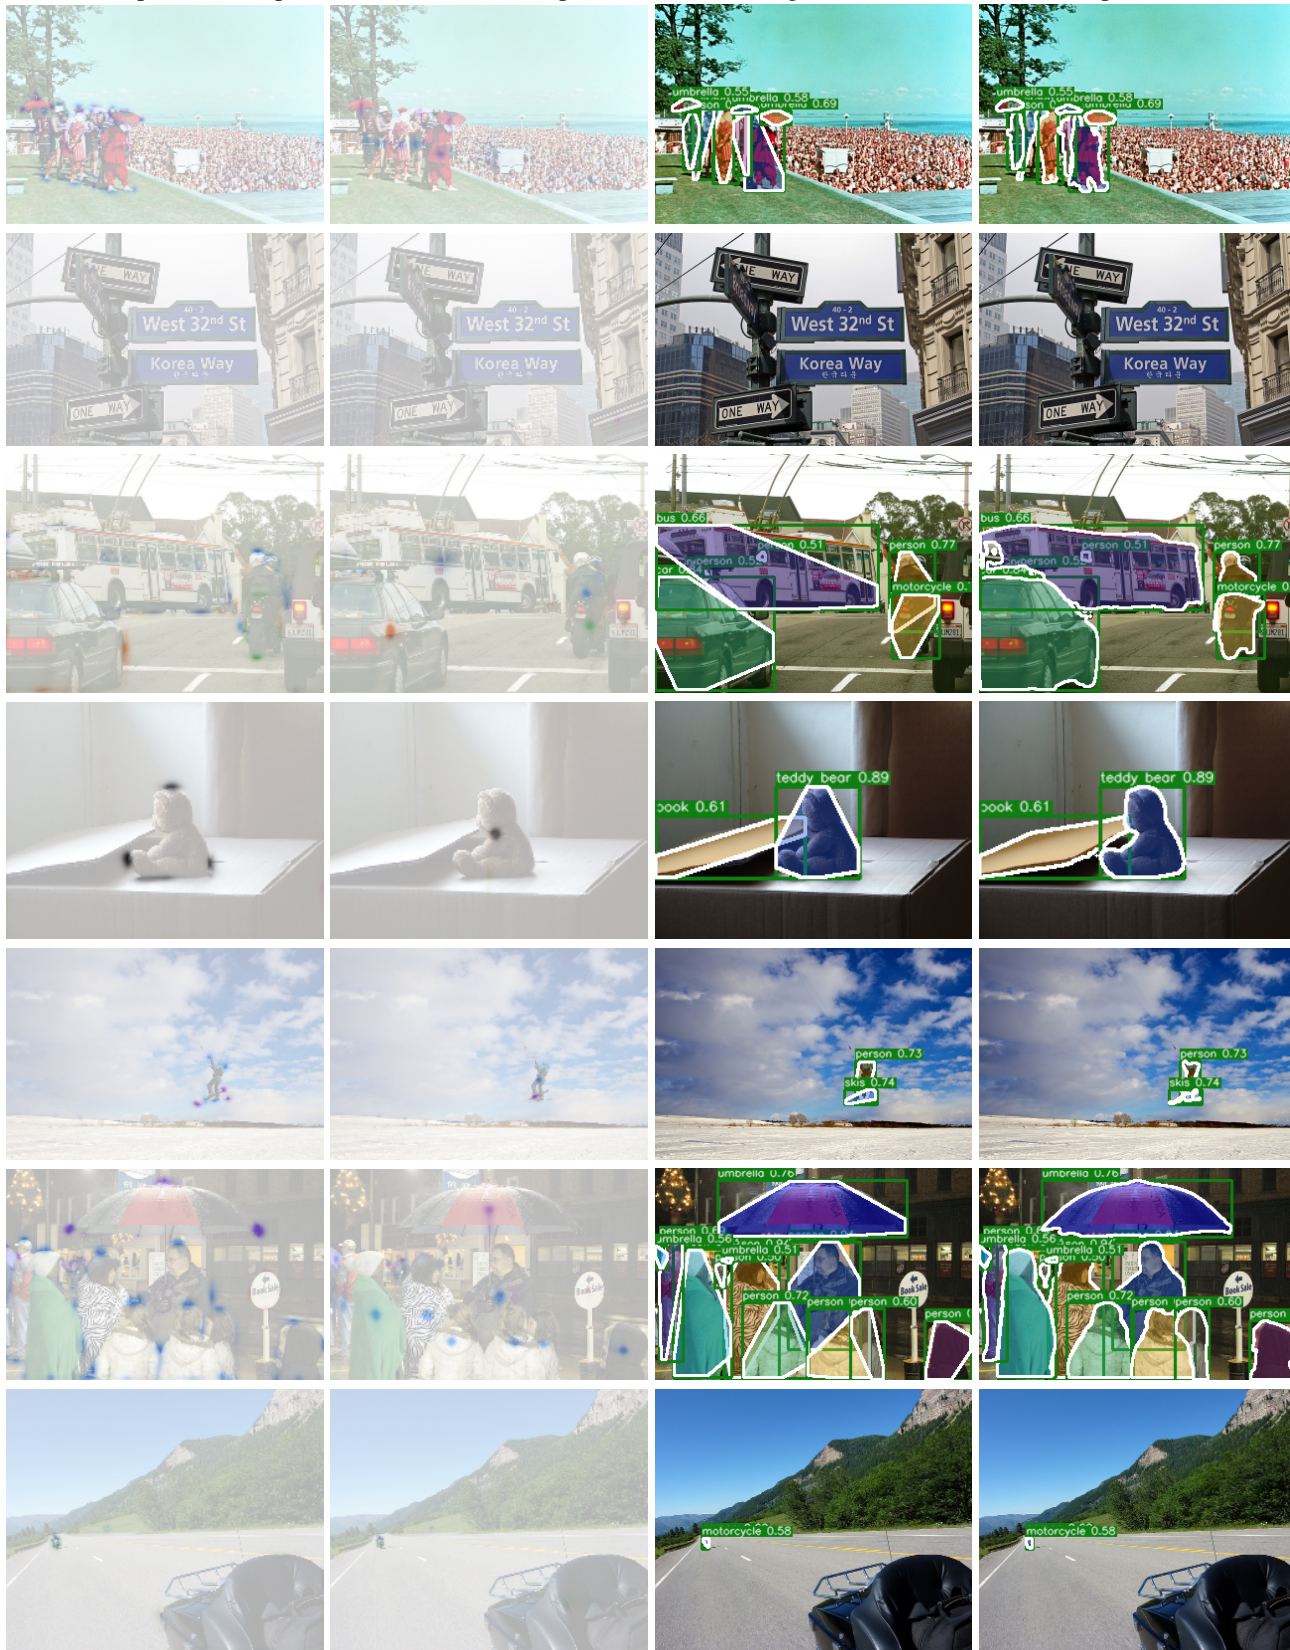

Extreme point heatmap

Center heatmap

Octagon mask

Extreme points+DEXTR

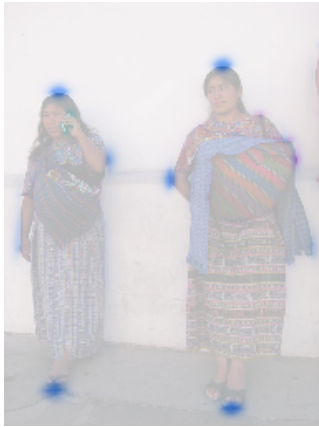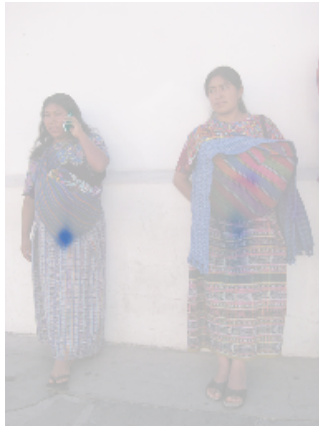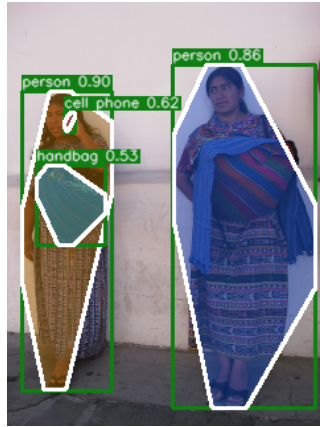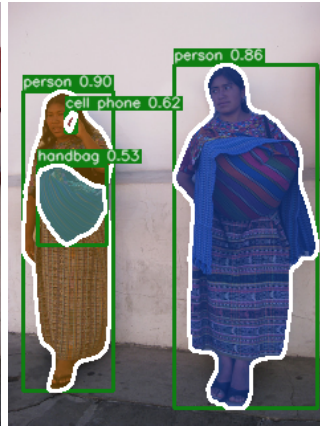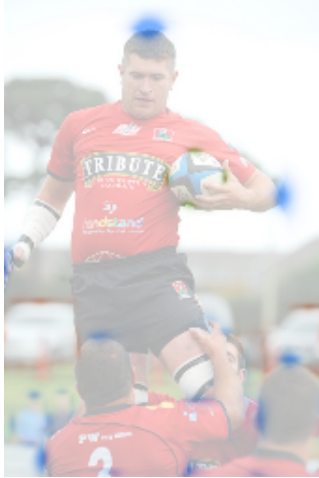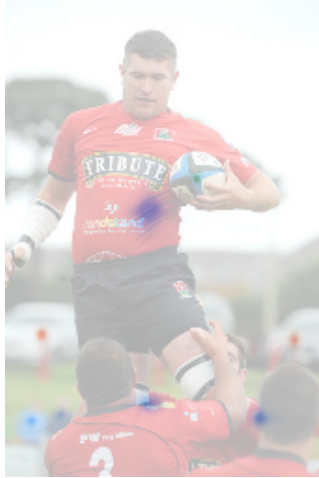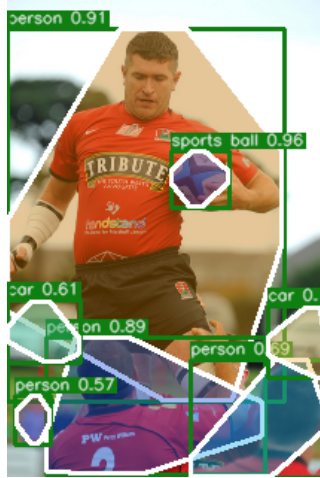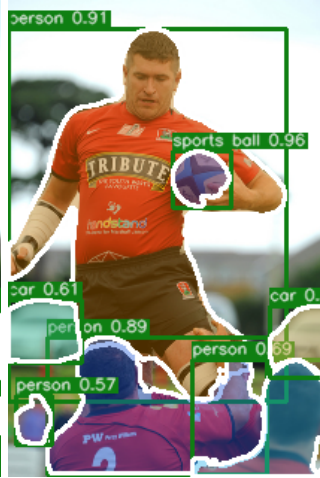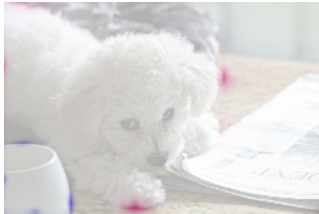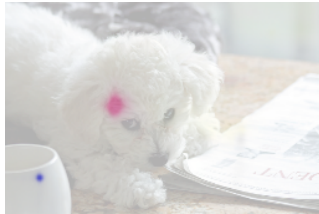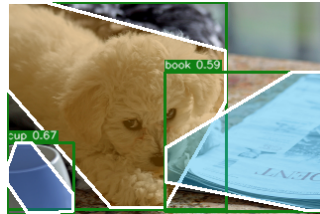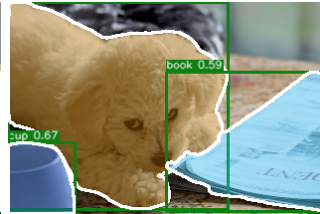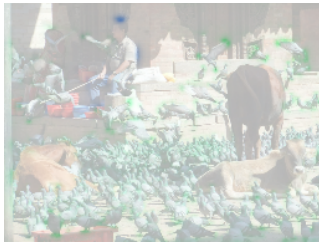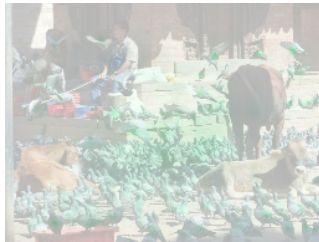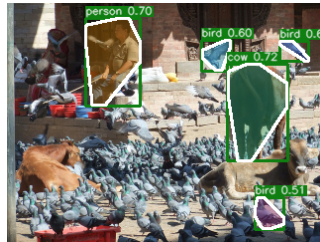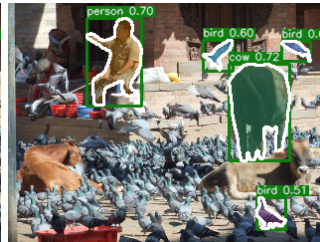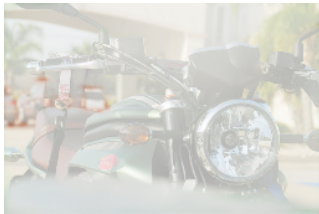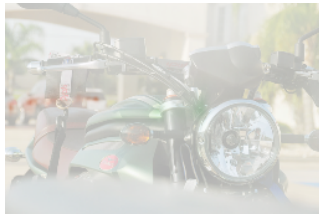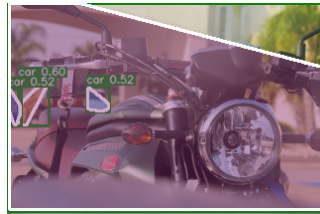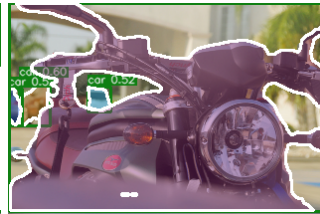

Extreme point heatmap

Center heatmap

Octagon mask

Extreme points+DEXTR

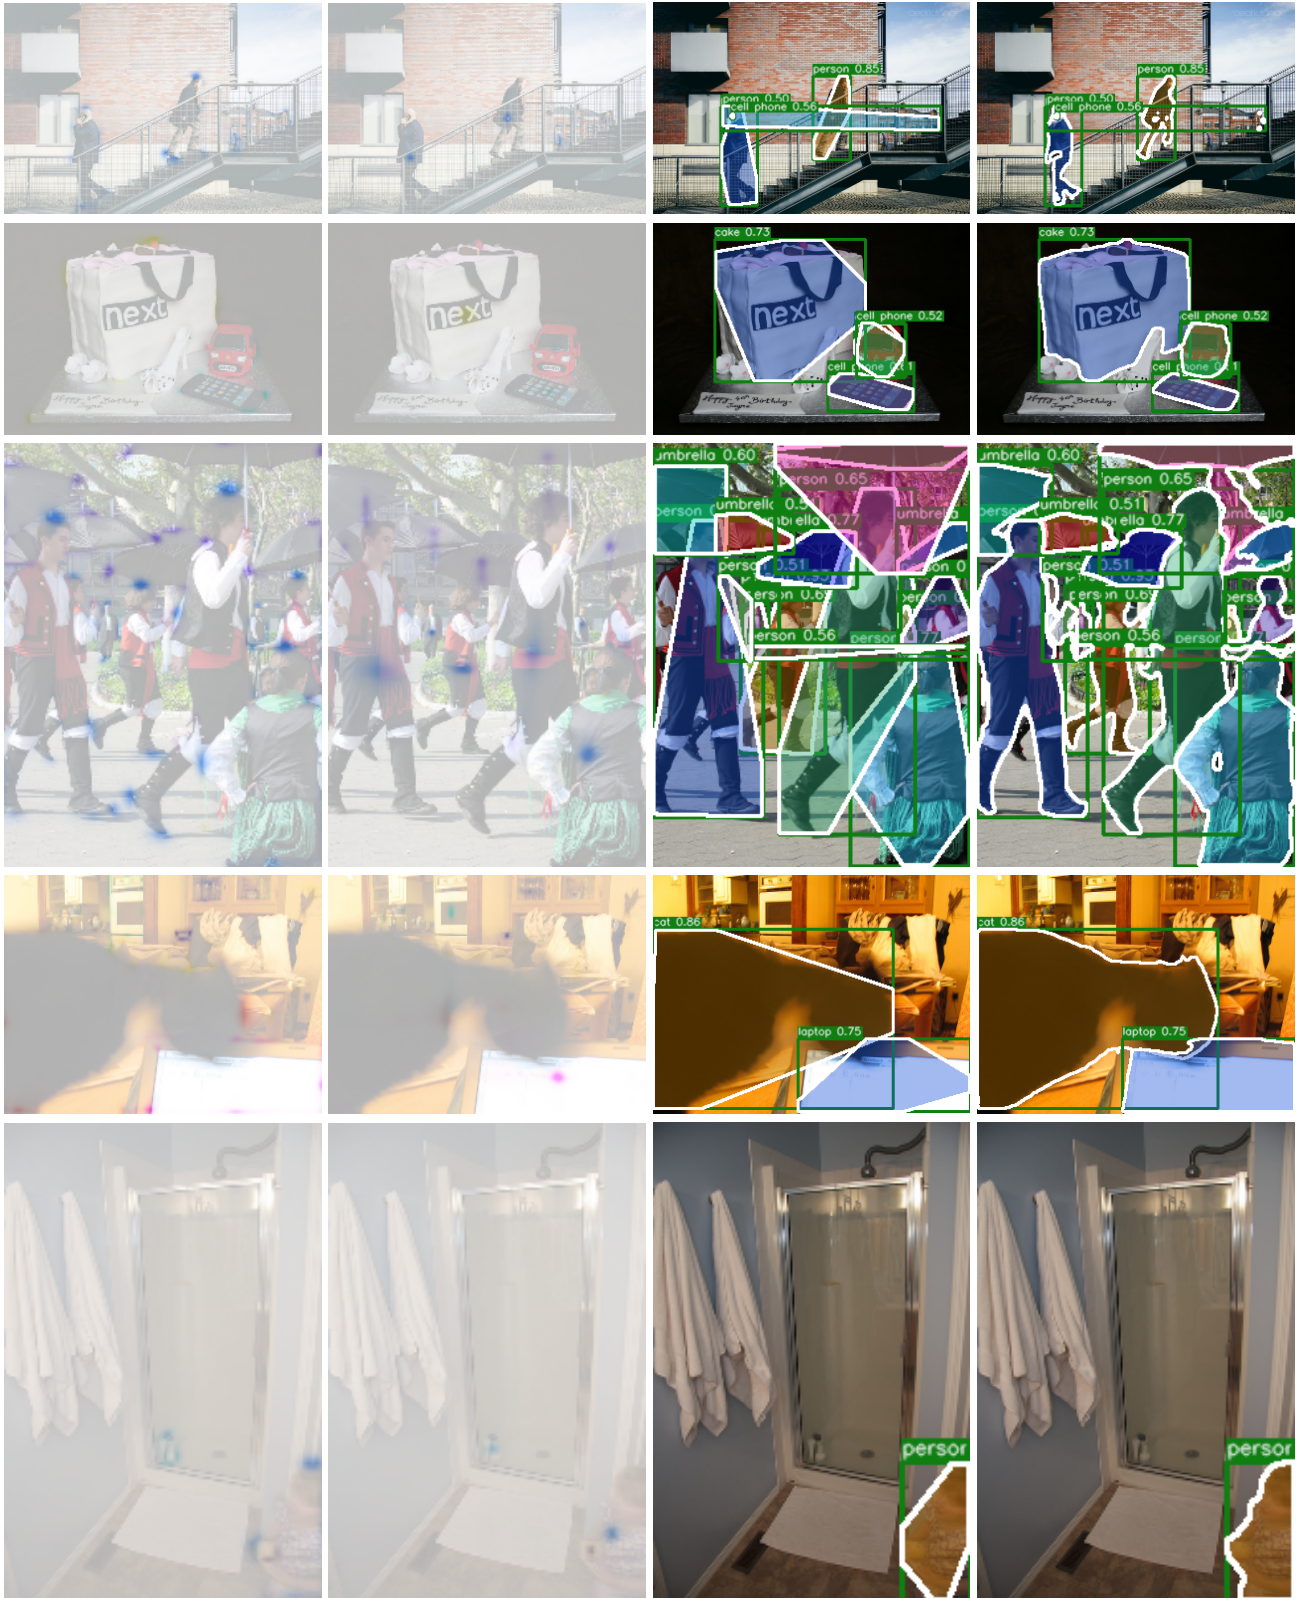

Extreme point heatmap

Center heatmap

Octagon mask

Extreme points+DEXTR

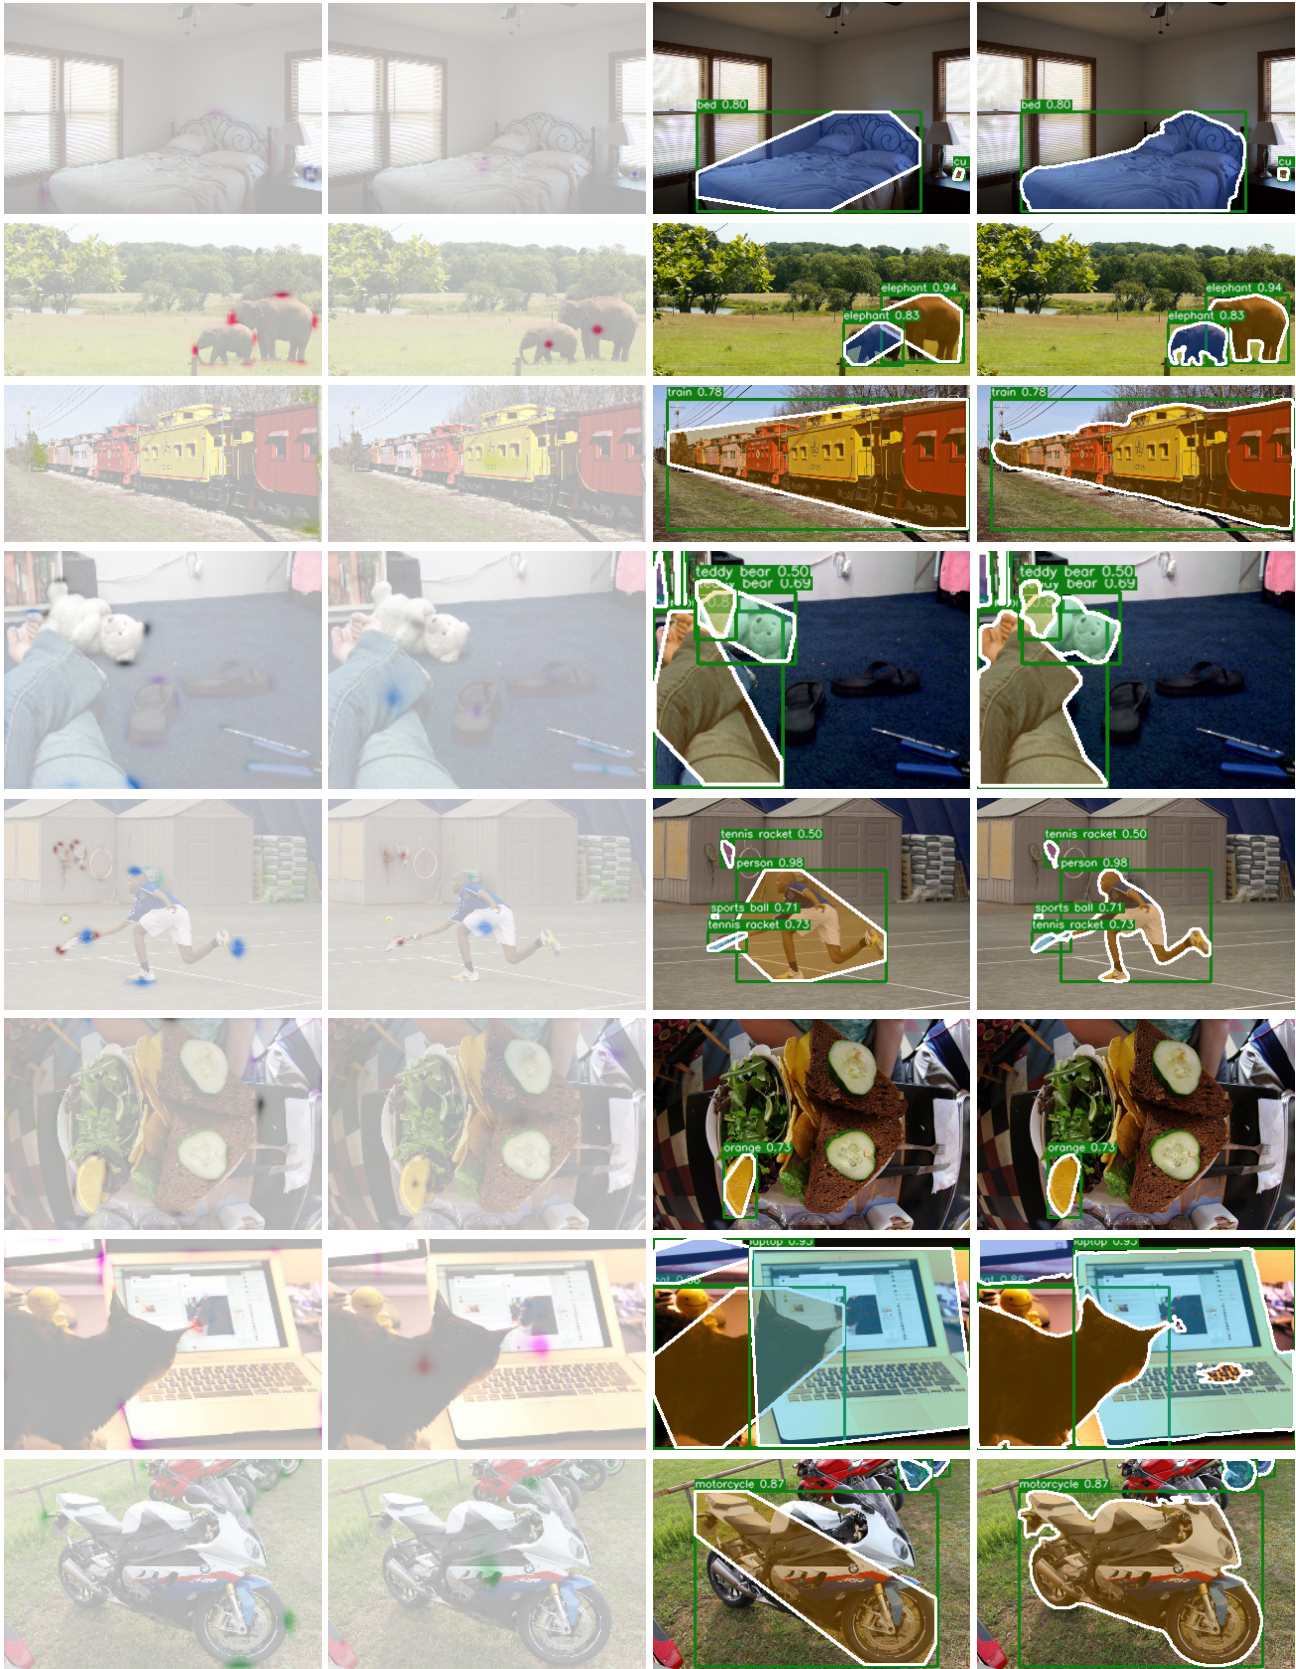

Extreme point heatmap

Center heatmap

Octagon mask

Extreme points+DEXTR

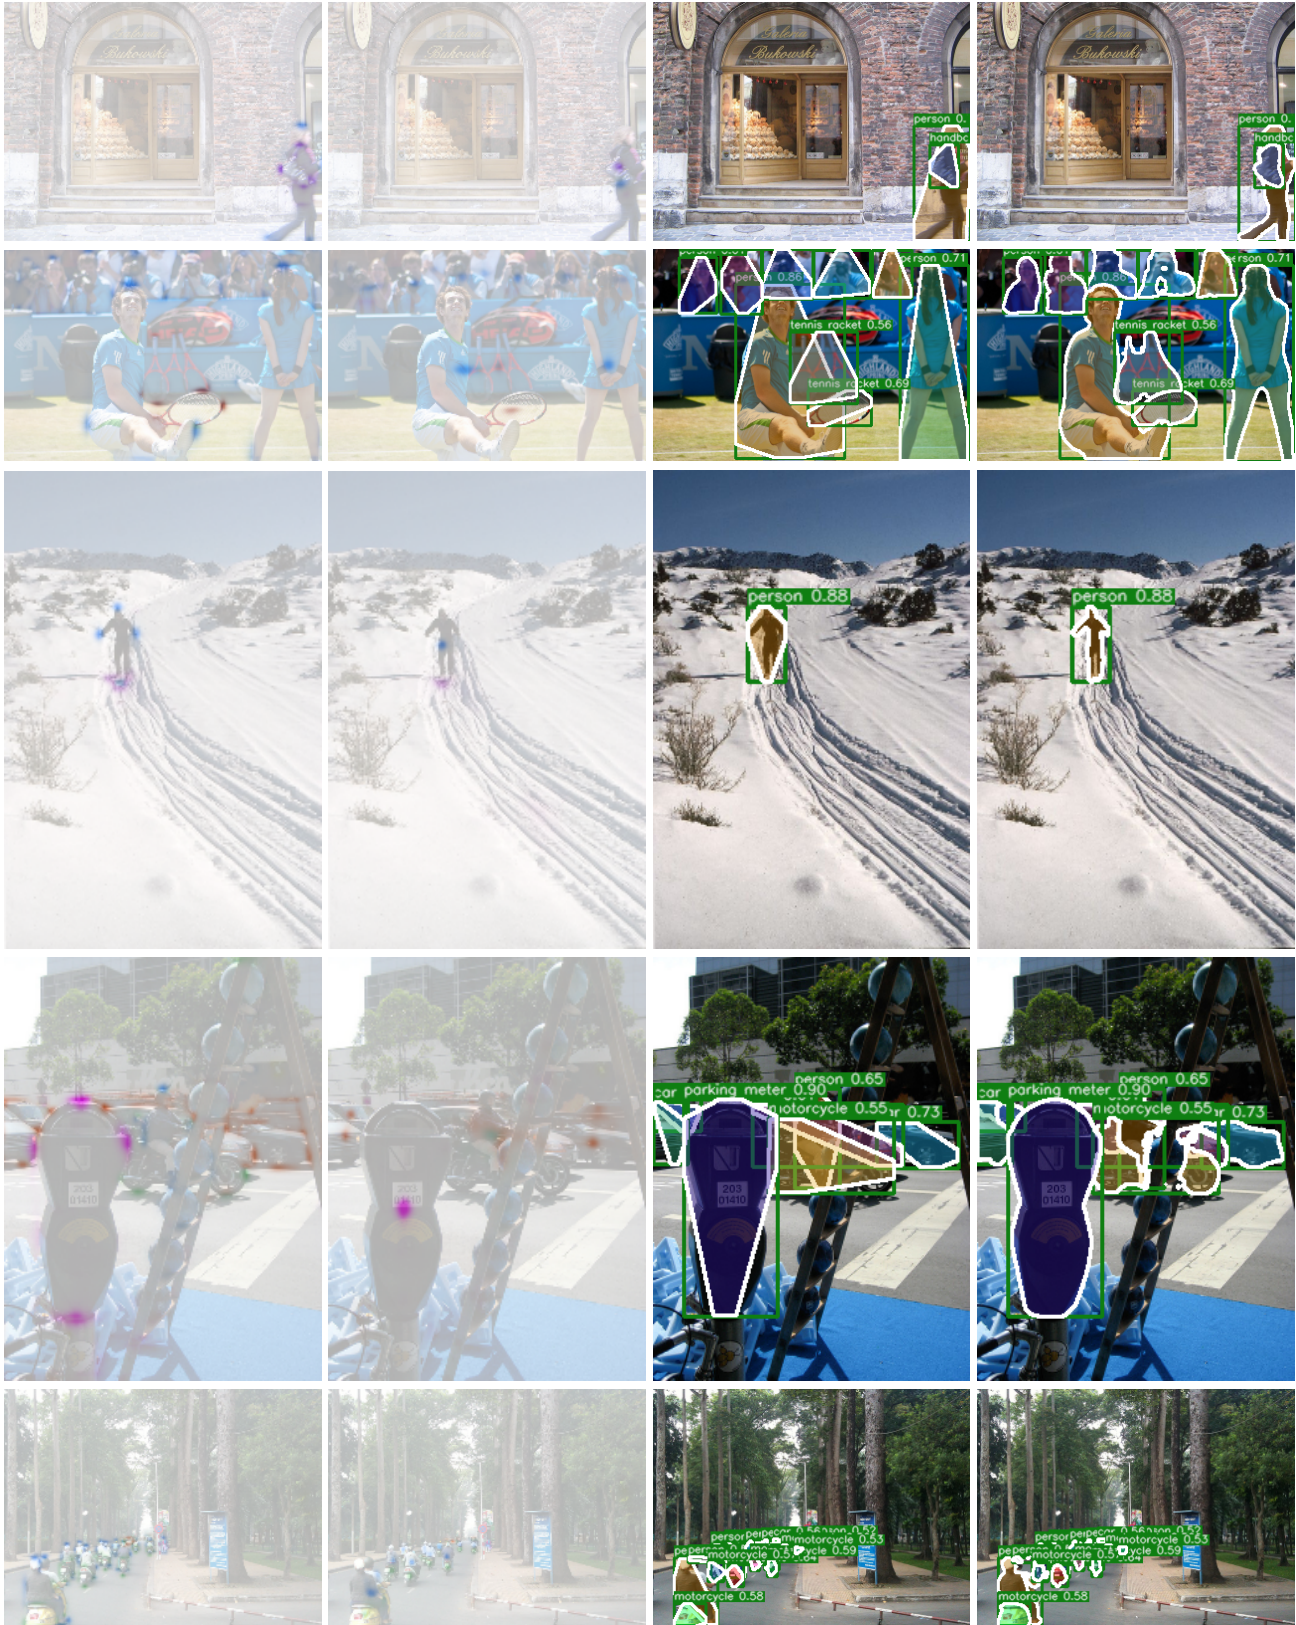



Extreme point heatmap

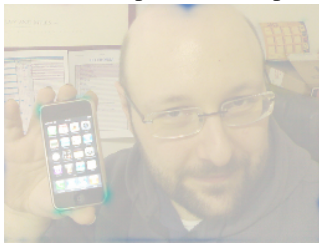

Center heatmap

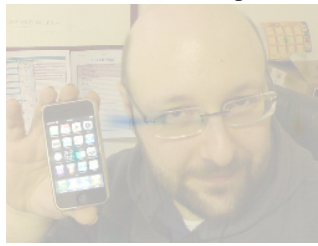

Octagon mask

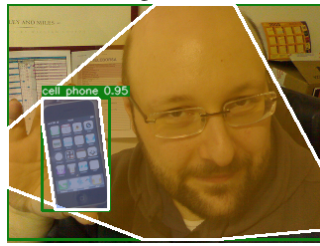

Extreme points+DEXTR

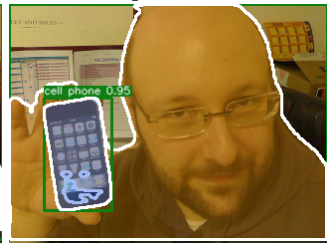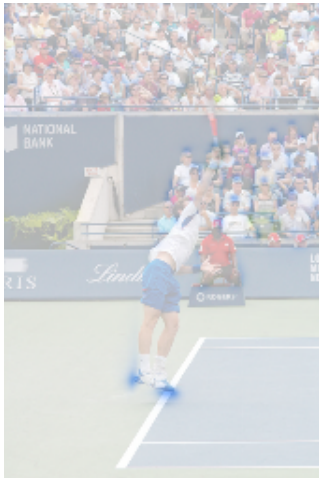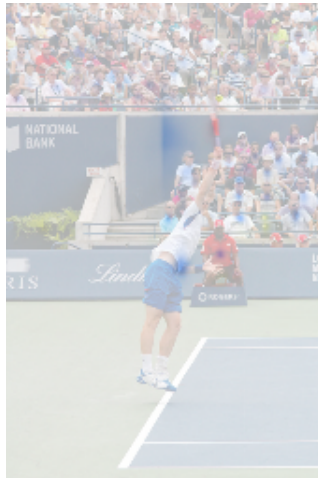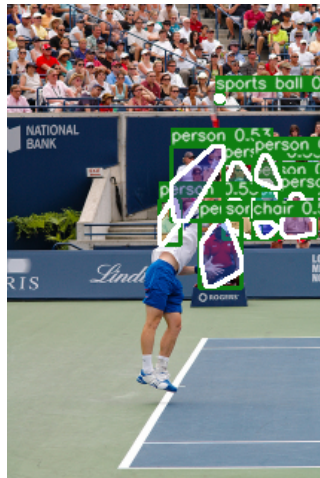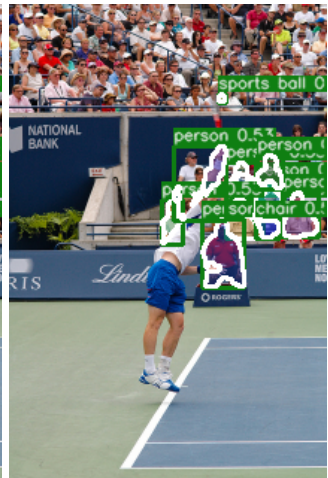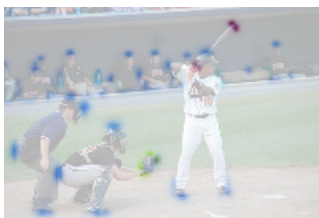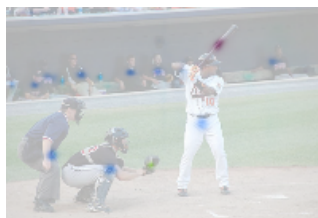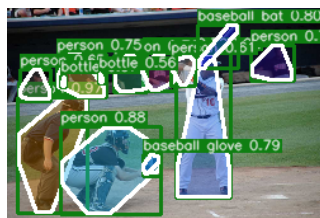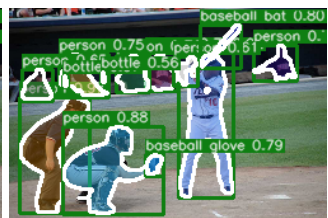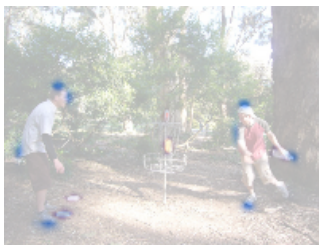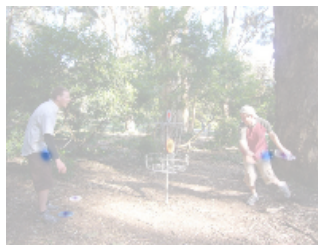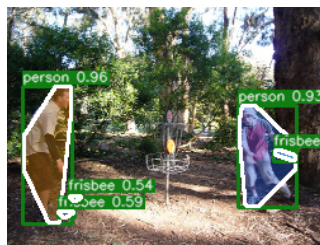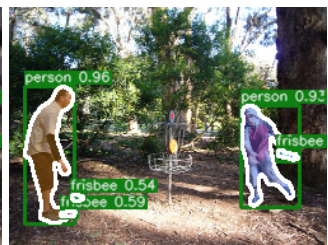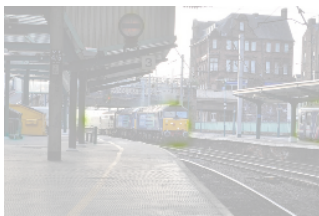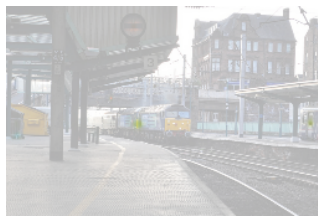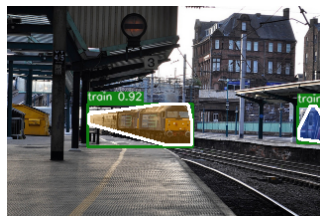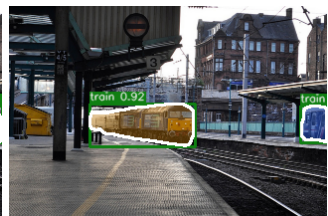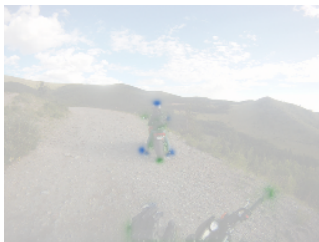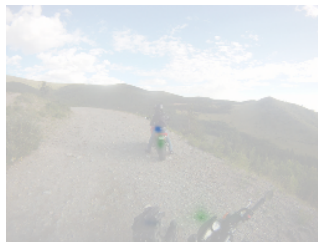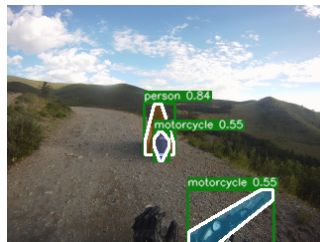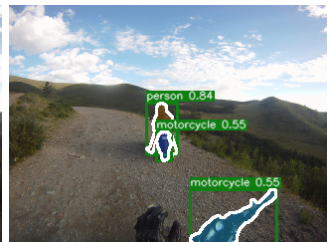

Extreme point heatmap

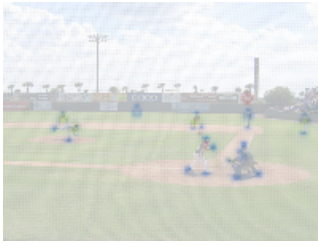

Center heatmap

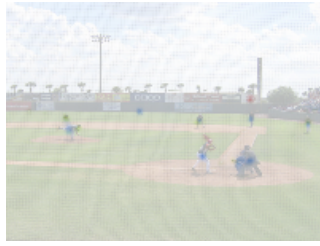

Octagon mask

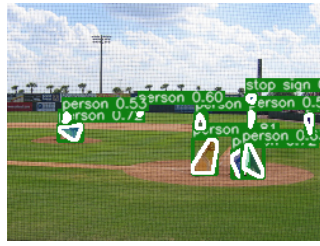

Extreme points+DEXTR

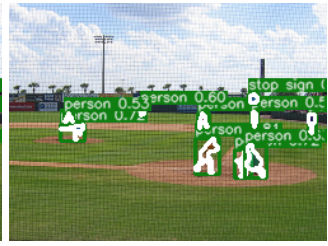

## References

- [1] Hei Law and Jia Deng. Cornernet: Detecting objects as paired keypoints. In *ECCV*, 2018. 1
- [2] K.K. Maninis, S. Caelles, J. Pont-Tuset, and L. Van Gool. Deep extreme cut: From extreme points to object segmentation. In *CVPR*, 2018. 1
